# Supplementary material for: Lysophosphatidic Acid Promotes Cell Migration through STIM1- and Orai1-Mediated Ca2+i Mobilization and NFAT2 Activation
Source: PubMed Central journal article supplement — J Invest Dermatol. 2012 Oct 25;133(3):793–802. doi: 10.1038/jid.2012.370 (PMC3572452; doi:10.1038/jid.2012.370), 2012-10-25
Supplement: jid2012370x1.pdf [file jid2012370x1.pdf]

GFP

Brightfield

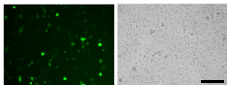

Supplementary figure 1. Transfection efficiency of siRNA following nucleofection. Primary keratinocytes were transfected with GFP using nucleofection, 24hours post transfection cells were imaged using a fluorescence microscope to determine transfection efficiency. Scale bar=100  $\mu$ m.

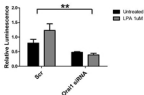

Supplementary figure 2. Dual luciferase reporter assay shows significantly less LPA-triggered activation of NFAT2 after transfection with Orai1-directed siRNA compared to scrambled siRNA. Cells were treated with 10uM LPA for 24h where indicated (\*\*  $p < 0.01$ , 2-way ANOVA)

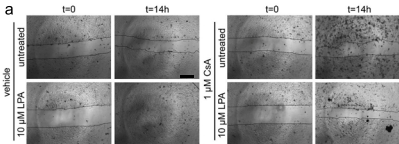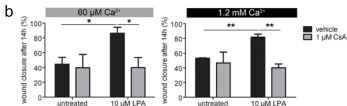

Supplementary fig.3 : LPA-induced keratinocyte migration into scratch wounds requires calcineurin activity. (A) Keratinocyte cultures were subjected to 2D scratch wounding assays, which were performed in medium containing 60  $\mu$ M Ca<sup>2+</sup> or physiological 1.2 mM Ca<sup>2+</sup>. The average percentages of wound closure (B) are represented as bar graphs  $\pm$ SEM. Pre-incubation of cells with 1  $\mu$ M cyclosporin A significantly impaired LPA-induced migration in both assays ( $n \geq 3$ , \*\*  $p < 0.01$ , \*  $p < 0.05$ , t test and 2-way ANOVA). Scale bar=100  $\mu$ m.
